# Supplementary material for: Characterization of a Novel SARS-CoV-2 Genetic Variant with Distinct Spike Protein Mutations
Source: MDPI journal article supplement (doi:10.3390/v13061029), 2021-05-29
Supplement: s1 [file s1]

**Table S1.** Primers used for near-complete genomic sequencing of SARS-CoV-2.

| Reg. No. | Pool | Left Primer Name | Left Primer Sequence                   | Right Primer Name | Right Primer Sequence            | Product Length | Trimmed Overlap |
|----------|------|------------------|----------------------------------------|-------------------|----------------------------------|----------------|-----------------|
| 1        | 1    | CoV-2_1_L        | ACCAACCAACT<br>TTCGATCTCTTG<br>T       | CoV-2_1_R         | TGTCTCACCAC<br>TACGACCGTAC       | 545            | 0               |
| 2        | 2    | CoV-2_2_L        | CATCAAACGTT<br>CGGATGCTCGA             | CoV-2_2_R         | GGACATTCCCC<br>ATTGAAGGTGT       | 604            | 55              |
| 3        | 3    | CoV-2_3_L        | GCATGAAATTG<br>CTTGGTACACG<br>G        | CoV-2_3_R         | ACCTTCGGAAC<br>CTTCTCCAACA       | 632            | 62              |
| 4        | 4    | CoV-2_4_L        | GTGGTTGCCA<br>TAACAAGTGTG<br>C         | CoV-2_4_R         | ACACCACCTGT<br>AATGTAGGCCA       | 576            | 50              |
| 5        | 1    | CoV-2_5_L        | AGGCCGCTATA<br>ACAATACTAGA<br>TGGA     | CoV-2_5_R         | TGTGGGAAGTG<br>TTTCTCCCTCT       | 558            | 75              |
| 6        | 2    | CoV-2_6_L        | TCAAAGGGATT<br>GTACAGAAAGT<br>GTGT     | CoV-2_6_R         | AATCAATGCCC<br>AGTGGTGTAAG<br>T  | 554            | 62              |
| 7        | 3    | CoV-2_7_L        | TCGGTACAGAA<br>GTAAATGAGTT<br>CGC      | CoV-2_7_R         | TGGCTGCATTA<br>ACAACCACTGT       | 595            | 50              |
| 8        | 4    | CoV-2_8_L        | CCAGTTGTTCA<br>GACTATTGAAG<br>TGAATAG  | CoV-2_8_R         | CAGCGATCTTT<br>TGTTCAACTTG<br>CT | 563            | 81              |
| 9        | 1    | CoV-2_9_L        | TCGCACAAATG<br>TCTACTTAGCT<br>GT       | CoV-2_9_R         | CGCAAATTCCA<br>AGAAACAGTTC<br>CA | 622            | 58              |
| 10       | 2    | CoV-2_10_L       | AGAGGAGGCA<br>AAGACAGTGCT<br>T         | CoV-2_10_R        | CCATCTAGGTG<br>GAATGTGGTAG<br>GA | 628            | 64              |
| 11       | 3    | CoV-2_11_L       | ACCATCTCACT<br>TGCTGGTTCCT             | CoV-2_11_R        | AGCATCTTGTA<br>GAGCAGGTGG<br>A   | 586            | 87              |
| 12       | 4    | CoV-2_12_L       | ACTTCTATTAA<br>ATGGGCAGATA<br>ACAACCTG | CoV-2_12_R        | AGCACCGTCTA<br>TGCAATACAAA<br>GT | 562            | 50              |

|    |   |            |                                         |            |                                    |     |    |
|----|---|------------|-----------------------------------------|------------|------------------------------------|-----|----|
| 13 | 1 | CoV-2_13_L | CAGTATGAACT<br>TAAGCATGGTA<br>CATTACT   | CoV-2_13_R | GGTTTTGTGCTC<br>CAAAGACAAC<br>G    | 618 | 62 |
| 14 | 2 | CoV-2_14_L | ACACACCCTCT<br>TTTAAGAAAGG<br>AGC       | CoV-2_14_R | ACACCGTGTA<br>CTATGTTAGTA<br>GTTGT | 558 | 81 |
| 15 | 3 | CoV-2_15_L | GCTACTCATGG<br>TTTAGCTGCTGT             | CoV-2_15_R | TGCCAAAAACC<br>ACTCTGCAACT         | 625 | 63 |
| 16 | 4 | CoV-2_16_L | GTGGTTTAGAT<br>TCTTTAGACAC<br>CTATCCT   | CoV-2_16_R | ACTGTAGTGAC<br>AAGTCTCTCGC<br>A    | 553 | 61 |
| 17 | 1 | CoV-2_17_L | GCTTTTGCAAA<br>CTACACAATTG<br>GAAT      | CoV-2_17_R | CCTTGCCGAGC<br>TGCTGAAATAA         | 593 | 52 |
| 18 | 2 | CoV-2_18_L | ACGTACCAATG<br>GAAAACTCA<br>AAACA       | CoV-2_18_R | GCAGCAACAA<br>AAAGGAACAC<br>AAGT   | 548 | 63 |
| 19 | 3 | CoV-2_19_L | TGTTAATGTTGT<br>AACAAACAAAG<br>ATAGCACT | CoV-2_19_R | CGTGTGTCAGG<br>GCGTAAACTTT         | 610 | 50 |
| 20 | 4 | CoV-2_20_L | GCTGCTGAATG<br>TACAATTTT<br>AAGATGC     | CoV-2_20_R | CCAGGTAAGA<br>ATGAGTAAACT<br>GGTGT | 564 | 61 |
| 21 | 1 | CoV-2_21_L | TGAGGTTTAGA<br>AGAGCTTTTGG<br>TGA       | CoV-2_21_R | AACCACTCTGC<br>AAAACAGCTG<br>A     | 604 | 63 |
| 22 | 2 | CoV-2_22_L | TGTTGTCATCTC<br>GCAAAGGCTC              | CoV-2_22_R | AAGTCTGTGCC<br>AGCATGAACTC         | 630 | 61 |
| 23 | 3 | CoV-2_23_L | ATGGTTCATGT<br>GGTAGTGTTGG<br>T         | CoV-2_23_R | GTAACAACCAG<br>TGGTGTGTACC<br>C    | 541 | 60 |
| 24 | 4 | CoV-2_24_L | AGAAGATGAA<br>TTTACACCTTT<br>GATGTTGT   | CoV-2_24_R | GCCCACATGGA<br>AATGGCTTGAT         | 556 | 50 |
| 25 | 1 | CoV-2_25_L | ATGGTGCTAGG<br>AGAGTGTGGAC              | CoV-2_25_R | CTGGACACATT<br>GAGCCACAAT          | 573 | 52 |
| 26 | 2 | CoV-2_26_L | CCACTGTACAG<br>TCTAAAATGTC<br>AGATGT    | CoV-2_26_R | GGGAACACAA<br>CCATCTCTTGC<br>A     | 609 | 62 |

|    |   |            |                                        |            |                                 |     |    |
|----|---|------------|----------------------------------------|------------|---------------------------------|-----|----|
| 27 | 3 | CoV-2_27_L | GGGCAAAAGTT<br>ACTAGTGCTAT<br>GCA      | CoV-2_27_R | CCTACAAGGTG<br>GTTCCAGTTCT<br>G | 579 | 62 |
| 28 | 4 | CoV-2_28_L | GGAGGTAGGTT<br>TGTA CTTGAC<br>TG       | CoV-2_28_R | CCCACAGGGTC<br>ATTAGCACAAG      | 558 | 66 |
| 29 | 1 | CoV-2_29_L | CTGTA CTGCCG<br>TTGCCACATAG            | CoV-2_29_R | AGCATAGACG<br>AGGTC TGCCAT<br>T | 585 | 59 |
| 30 | 2 | CoV-2_30_L | GCTGTTGCTAA<br>ACATGACTTCT<br>TTAAGT   | CoV-2_30_R | TGGGTGGTATG<br>TCTGATCCCAA      | 607 | 57 |
| 31 | 3 | CoV-2_31_L | CAAAGCCTTAC<br>ATTAAGTGGGA<br>TTTGT    | CoV-2_31_R | GCAGCATTACC<br>ATCCTGAGCAA      | 563 | 54 |
| 32 | 4 | CoV-2_32_L | ACAAAGACTTC<br>TATGACTTTGC<br>TGTGT    | CoV-2_32_R | AACATGTTGTG<br>CCAACCACCAT      | 560 | 50 |
| 33 | 1 | CoV-2_33_L | ACTATGACCAA<br>TAGACAGTTTC<br>ATCAAAAA | CoV-2_33_R | AGCCACTAGAC<br>CTTGAGATGCA      | 640 | 60 |
| 34 | 2 | CoV-2_34_L | TTTGTGAATGA<br>GTTTTACGCAT<br>ATTGTC   | CoV-2_34_R | AGCCTGTAAGA<br>CTGTATGCGGT      | 580 | 60 |
| 35 | 3 | CoV-2_35_L | GCTACATGATG<br>AGTTAACAGGA<br>CACA     | CoV-2_35_R | CTCTGTCAGAC<br>AGCACTTCACG      | 612 | 81 |
| 36 | 4 | CoV-2_36_L | TCAAGCTTTTT<br>GCAGCAGAAA<br>CG        | CoV-2_36_R | TCACATAGTGC<br>ATCAACAGCGG      | 569 | 50 |
| 37 | 1 | CoV-2_37_L | GGTAAGAGTCA<br>TTTTGCTATTGG<br>CC      | CoV-2_37_R | TGCAGATGAAA<br>CATCATGCGTG<br>A | 604 | 50 |
| 38 | 2 | CoV-2_38_L | CACTGTGAGTG<br>CTTTGGTTTATG<br>AT      | CoV-2_38_R | TCATGTCCTTA<br>GGTATGCCAGG<br>T | 603 | 63 |
| 39 | 3 | CoV-2_39_L | TGGGTTACATC<br>CTACACAGGCA             | CoV-2_39_R | CATAGACAACA<br>GGTGCGCTCAG      | 583 | 55 |
| 40 | 4 | CoV-2_40_L | CTCTCTGACAG<br>AGTCGTATTTG<br>TCTT     | CoV-2_40_R | GTCACTACAAG<br>GCTGTGCATCA      | 547 | 52 |

|    |   |            |                                        |            |                                    |     |     |
|----|---|------------|----------------------------------------|------------|------------------------------------|-----|-----|
| 41 | 1 | CoV-2_41_L | CCCAGTTCTTC<br>ACGACATTGGT             | CoV-2_41_R | AAACCCACAA<br>GCTAAAGCCAG<br>C     | 555 | 52  |
| 42 | 2 | CoV-2_42_L | ACGTTGCAATT<br>TAGGTGGTGCT             | CoV-2_42_R | AGAACACCATT<br>ACGGGCATTTT<br>T    | 583 | 62  |
| 43 | 3 | CoV-2_43_L | AGCCAAGAAA<br>CCAACTGAAAC<br>GA        | CoV-2_43_R | TGAACCTGTTT<br>GCGCATCTGTT         | 542 | 58  |
| 44 | 4 | CoV-2_44_L | TGATTGGACTA<br>GCTAAACGTTT<br>TAAGGA   | CoV-2_44_R | AAACAGCTGTA<br>CCTGGTGCAAC         | 541 | 59  |
| 45 | 1 | CoV-2_45_L | TGAATGTCGCA<br>AAATATACTCA<br>ACTGTG   | CoV-2_45_R | AACCATCTATT<br>TGTTTCGCGTGG<br>T   | 541 | 78  |
| 46 | 2 | CoV-2_46_L | GCATGGTGGAC<br>AGCCTTTGTTA             | CoV-2_46_R | ACCTCTTAGTA<br>CCATTGGTCCC<br>A    | 579 | 57  |
| 47 | 3 | CoV-2_47_L | TCCTCAGTTTTA<br>CATTCAACTCA<br>GGA     | CoV-2_47_R | TGGTTCTAAAAG<br>CCGAAAAACC<br>CT   | 544 | 53  |
| 48 | 4 | CoV-2_48_L | AGGGAATTTGT<br>GTTTAAGAATA<br>TTGATGGT | CoV-2_48_R | ACTTAAAAGTG<br>GAAAATGATGC<br>GGAA | 569 | 54  |
| 49 | 1 | CoV-2_49_L | TAACGCCACCA<br>GATTGTCATCT             | CoV-2_49_R | TAGGTCCACAA<br>ACAGTTGCTGG         | 558 | 61  |
| 50 | 2 | CoV-2_50_L | GGTTTCCAACC<br>CACTAATGGTG<br>T        | CoV-2_50_R | TGACTAGCTAC<br>ACTACGTGCCC         | 585 | 51  |
| 51 | 3 | CoV-2_51_L | GCTGAACATGT<br>CAACAACATCA<br>ATGA     | CoV-2_51_R | TGATGAAGCCA<br>GCATCTGCAAG         | 548 | 64  |
| 52 | 4 | CoV-2_52_L | AGTCAAACAA<br>ATTTACAAAAC<br>ACCACCA   | CoV-2_52_R | TGCACTTCAGC<br>CTCAACTTTGT         | 625 | 101 |
| 53 | 1 | CoV-2_53_L | TGCACAAGCTT<br>TAAACACGCTT             | CoV-2_53_R | TGAGTCTAATT<br>CAGGTTGCAAA<br>GGA  | 578 | 66  |
| 54 | 2 | CoV-2_54_L | ACCACAAATCA<br>TTACTACAGAC<br>AACACA   | CoV-2_54_R | TGCAGTAGCGC<br>GAACAAAATCT         | 598 | 55  |

|    |   |            |                                        |            |                                   |     |     |
|----|---|------------|----------------------------------------|------------|-----------------------------------|-----|-----|
| 55 | 3 | CoV-2_55_L | AGGAGTCAAAT<br>TACATTACACA<br>TAAACGAA | CoV-2_55_R | GACTTGTTGTG<br>CCATCACCTGA        | 566 | 79  |
| 56 | 4 | CoV-2_56_L | GCCAACTATTT<br>TCTTTGCTGGC<br>A        | CoV-2_56_R | ACACAATCGAA<br>GCGCAGTAAG<br>G    | 547 | 60  |
| 57 | 1 | CoV-2_57_L | CGTTTCGGAAG<br>AGACAGGTAC<br>G         | CoV-2_57_R | AATGACCACAT<br>GGAACGCGTAC        | 603 | 64  |
| 58 | 2 | CoV-2_58_L | TGGATCACCGG<br>TGAATTGCTA              | CoV-2_58_R | TCAATCTCCAT<br>TGGTTGCTCTTC<br>A  | 640 | 68  |
| 59 | 3 | CoV-2_59_L | TTATGAGGACT<br>TTTAAAGTTTC<br>CATTGGA  | CoV-2_59_R | TGTTTCGTTTAG<br>GCGTGACAAGT       | 642 | 75  |
| 60 | 4 | CoV-2_60_L | TTTGTGCTTTT<br>AGCCTTTCTGC<br>T        | CoV-2_60_R | ACTGCCAGTTG<br>AATCTGAGGGT        | 568 | 63  |
| 61 | 1 | CoV-2_61_L | AGAGTATCATG<br>ACGTTTCGTGT<br>GT       | CoV-2_61_R | GAACGAGAAG<br>AGGCTTGACTG<br>C    | 612 | 85  |
| 62 | 2 | CoV-2_62_L | GCAATCCTGCT<br>AACAATGCTGC             | CoV-2_62_R | CTGTGTAGGTC<br>AACCACGTTCC        | 559 | 67  |
| 63 | 3 | CoV-2_63_L | CATTGGCCGCA<br>AATTGCACAAT             | CoV-2_63_R | TAGGCAGCTCT<br>CCCTAGCATTG        | 621 | 61  |
| 64 | 4 | CoV-2_64_L | TGGATGACAAA<br>GATCCAAATTT<br>CAAAGA   | CoV-2_64_R | AAAATCACATG<br>GGGATAGCACT<br>ACT | 561 | 451 |
